# Supplementary material for: Carbon dioxide induced bubble formation in a CH4–CO2–H2O ternary system: a molecular dynamics simulation study
Source: Royal Society of Chemistry journal article supplement (doi:10.1039/c5cp05623c), 2016-01-01
Supplement: c5cp05623c1.pdf [file c5cp05623c1.pdf]

160 CO<sub>2</sub>

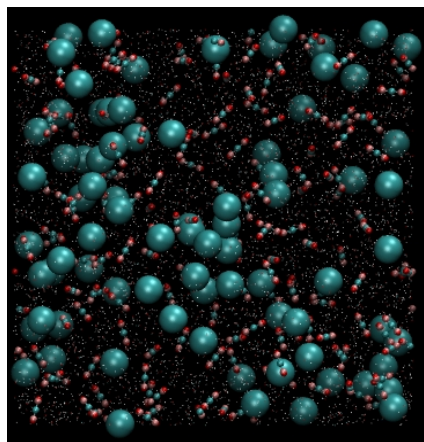

**t = 1 ns**

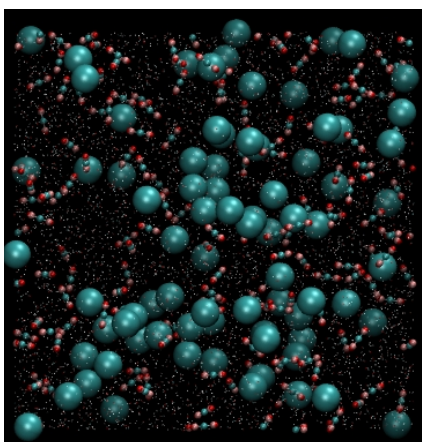

**t = 3 ns**

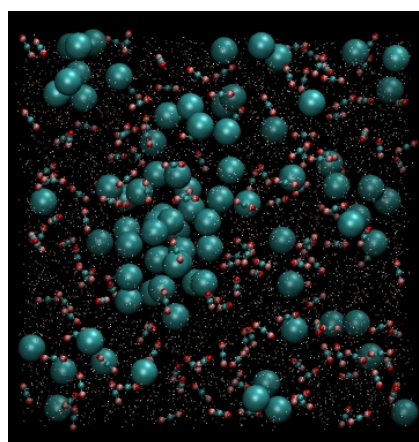

**t = 3.5 ns**

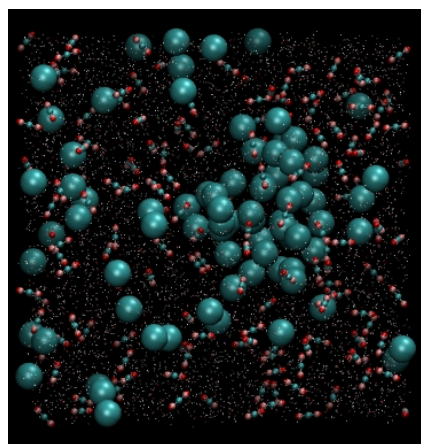

**t = 4 ns**

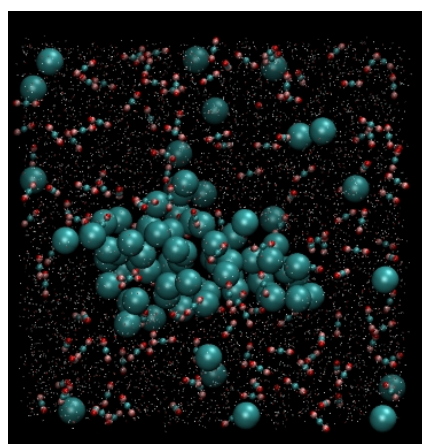

**t = 5 ns**

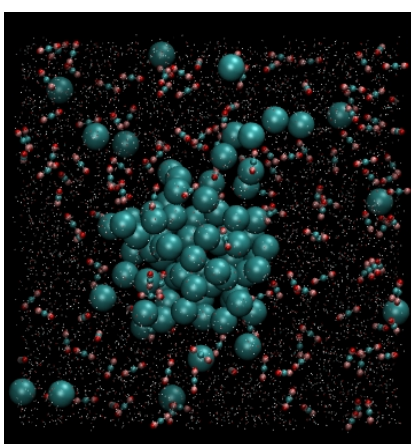

**t = 7 ns**

180 CO<sub>2</sub>

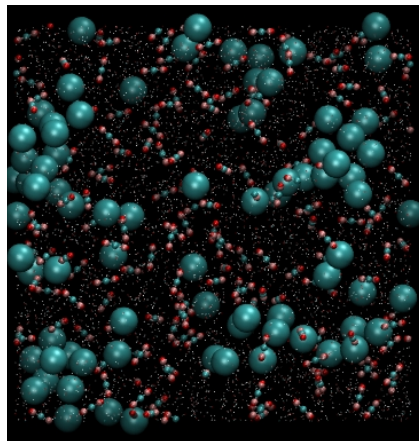

**t = 0 ns**

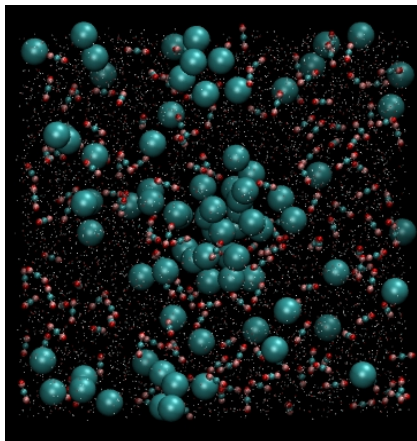

**t = 2 ns**

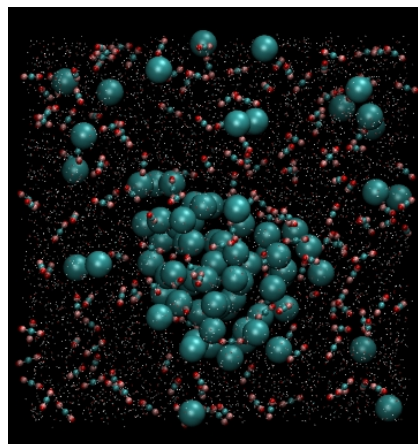

**t = 3 ns**

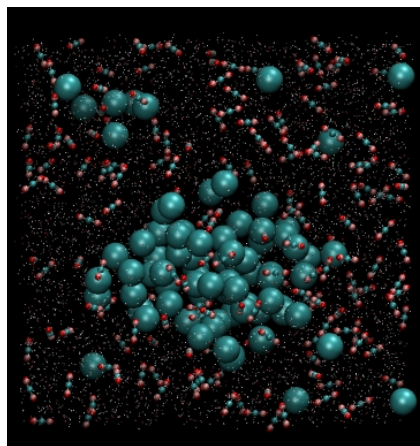

**t = 5 ns**

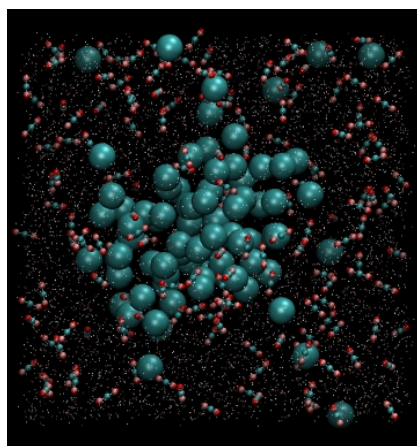

**t = 7 ns**

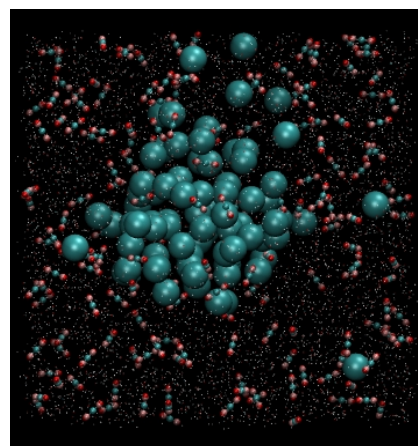

**t = 9 ns**



200 CO<sub>2</sub>

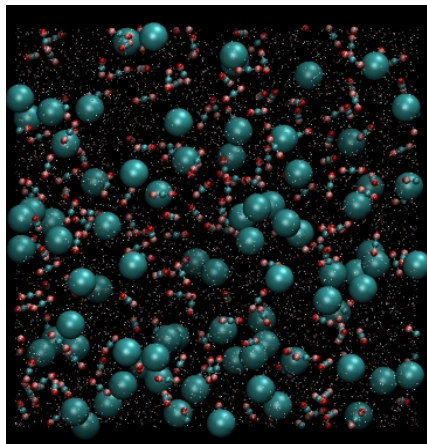

**t = 0 ns**

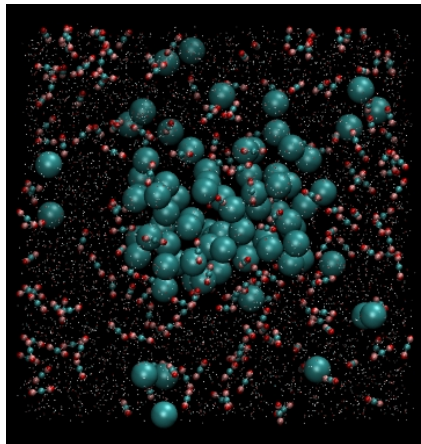

**t = 2 ns**

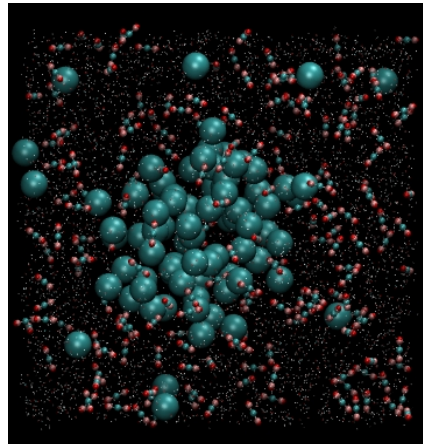

**t = 3 ns**

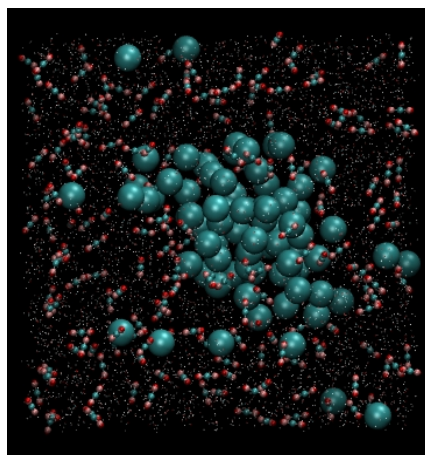

**t = 4 ns**

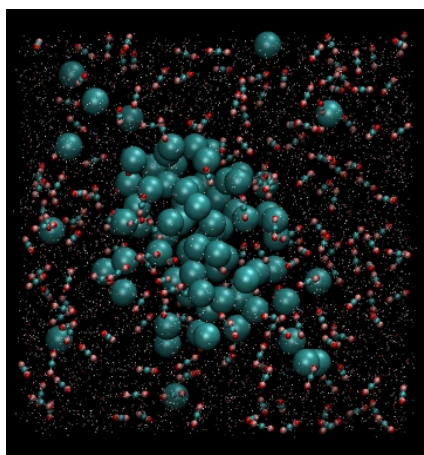

**t = 7 ns**

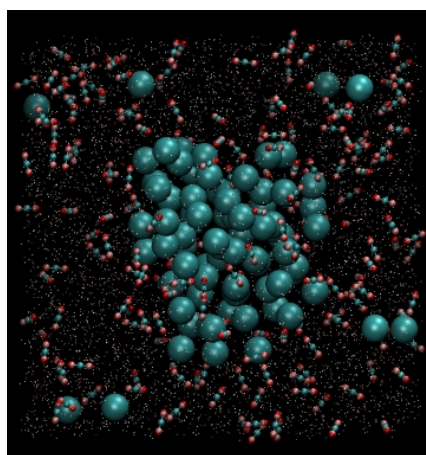

**t = 9 ns**

220 CO<sub>2</sub>

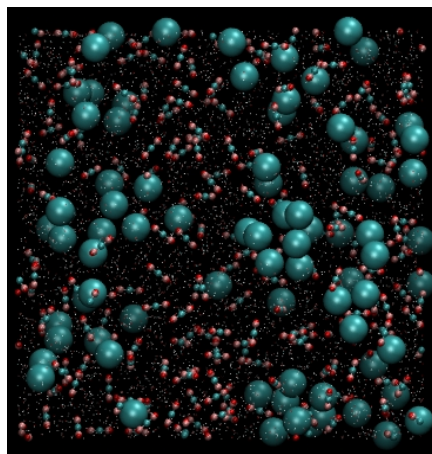

**t = 0 ns**

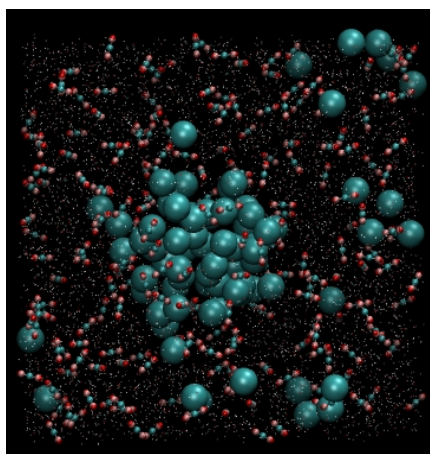

**t = 2 ns**

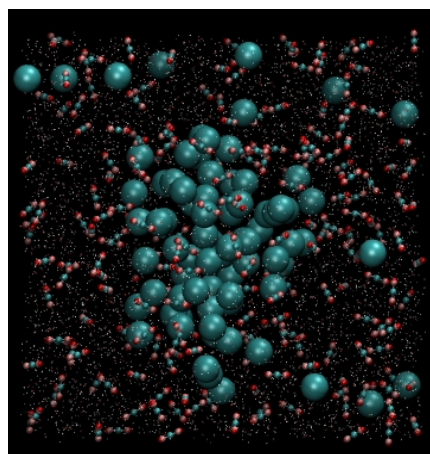

**t = 3 ns**

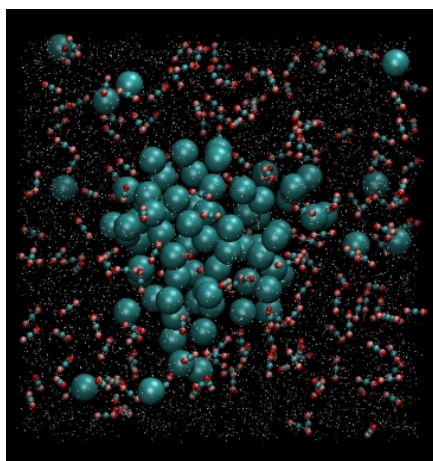

**t = 4 ns**

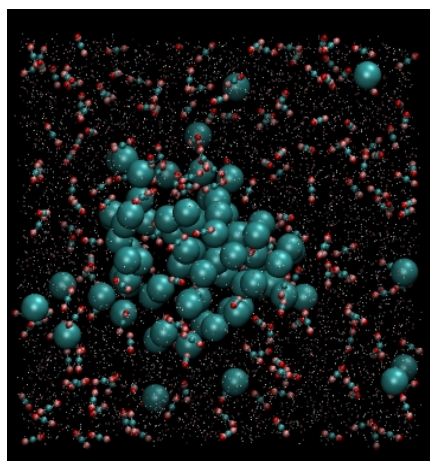

**t = 7 ns**

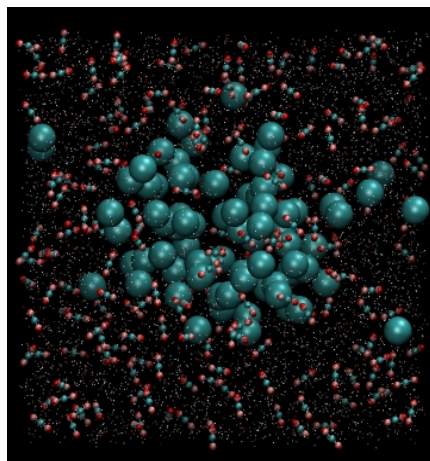

**t = 9 ns**



240 CO<sub>2</sub>

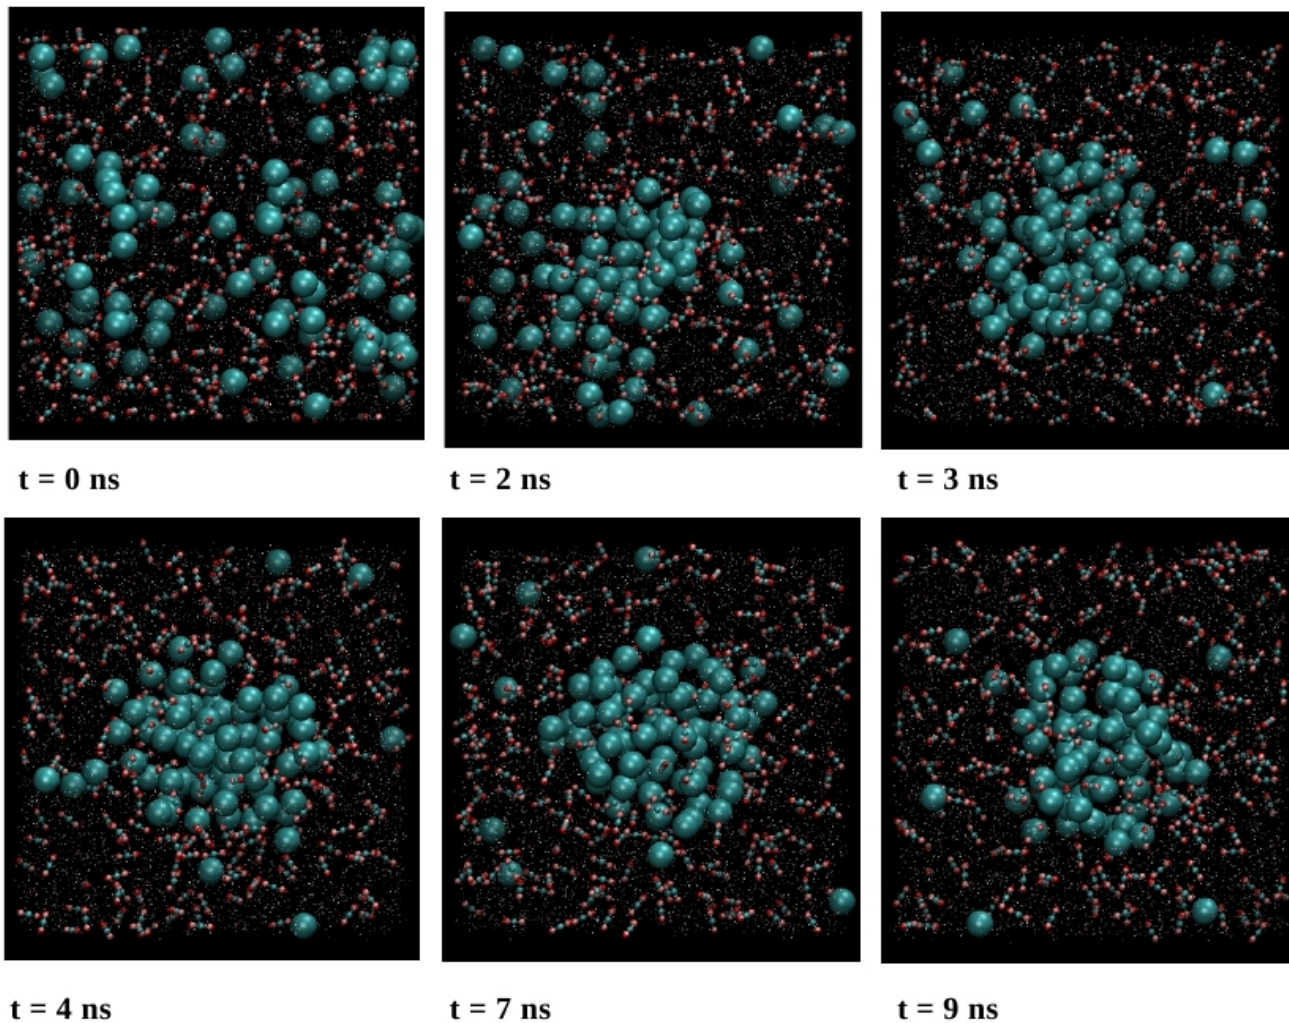

**Figure S1: Bubble formation in the CH<sub>4</sub>-CO<sub>2</sub>-H<sub>2</sub>O ternary system in the presence of various number of CO<sub>2</sub> molecules. Methane molecules are represented as large green dots, carbon dioxide by ball and stick model and water molecules are shown as small dots.**

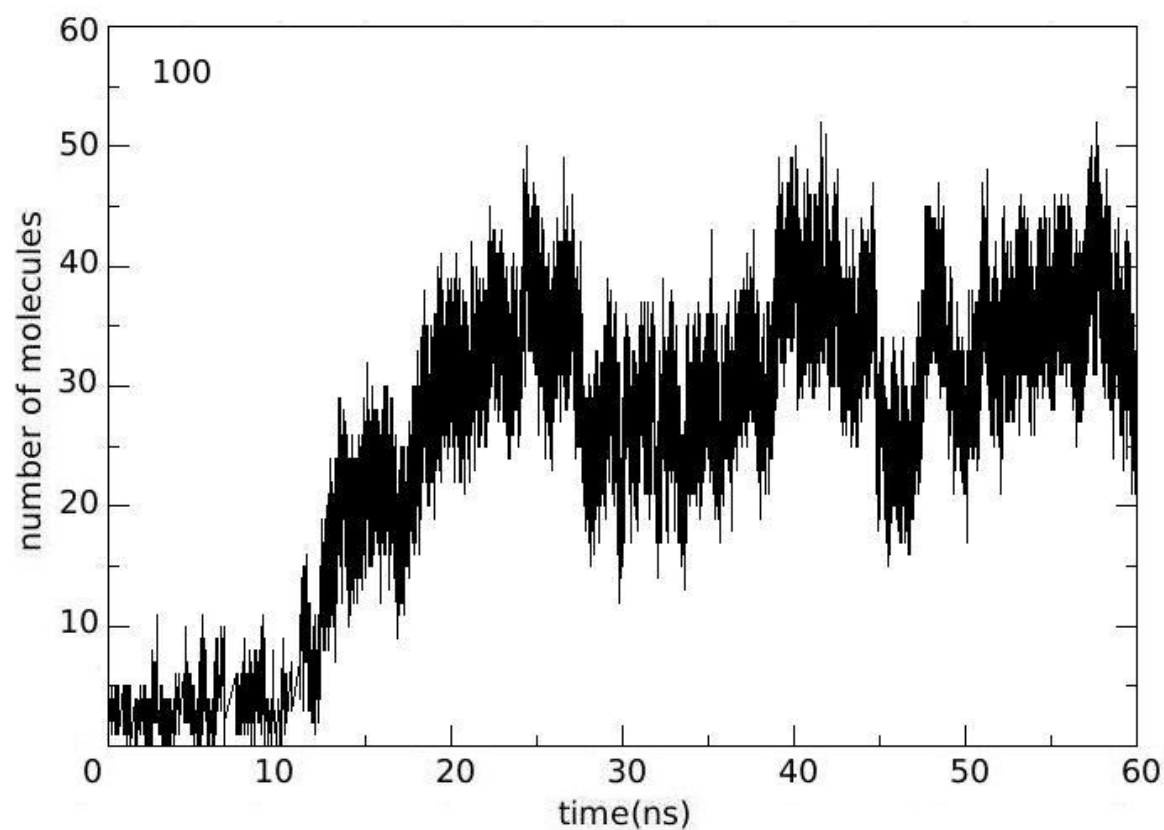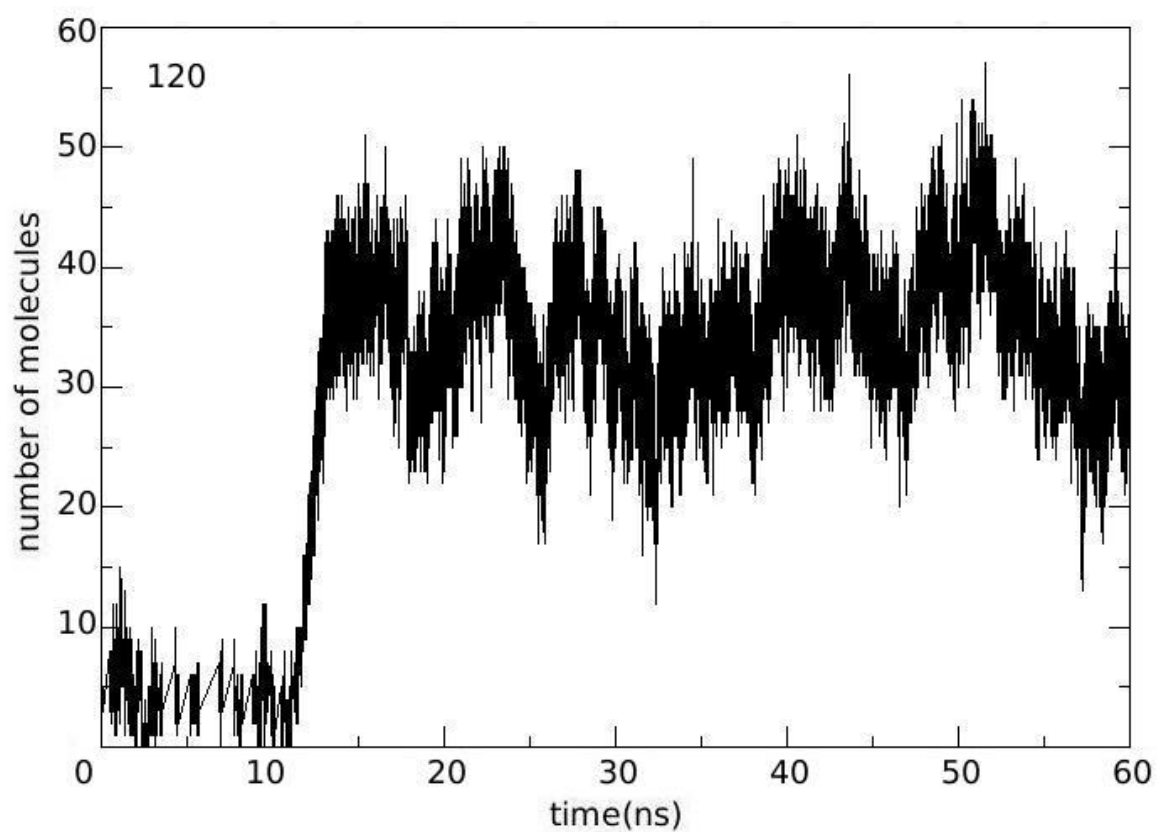

**Figure S2 : The number of CH<sub>4</sub> molecules in the gas bubble as a function of time for the CH<sub>4</sub>-CO<sub>2</sub>-H<sub>2</sub>O ternary systems with 100 and 120 CO<sub>2</sub> molecules.**

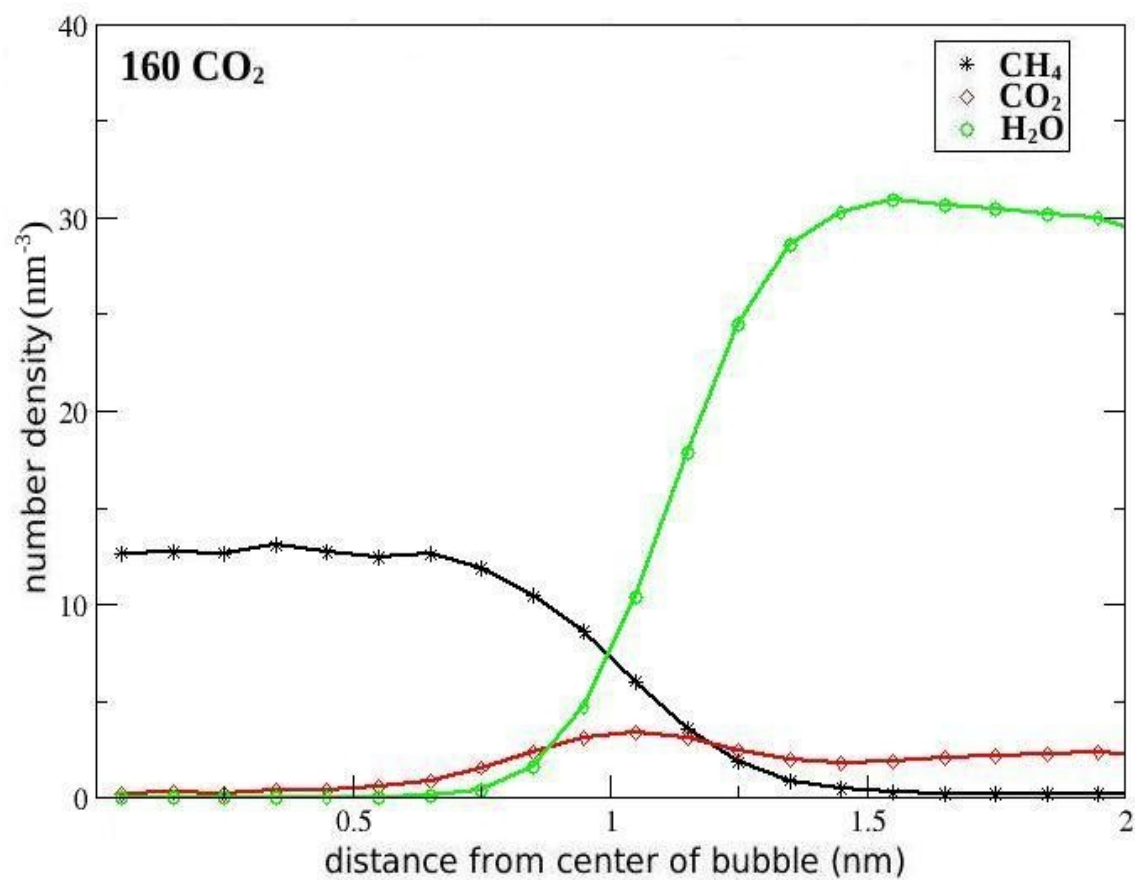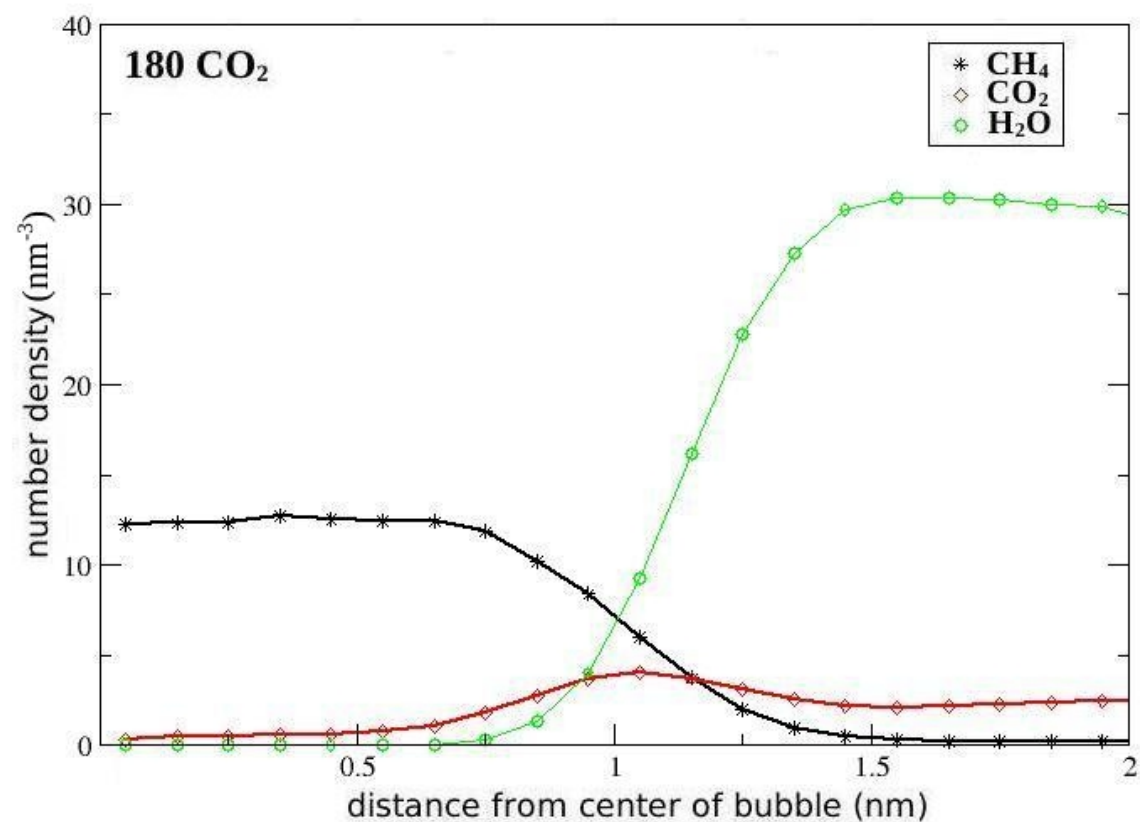

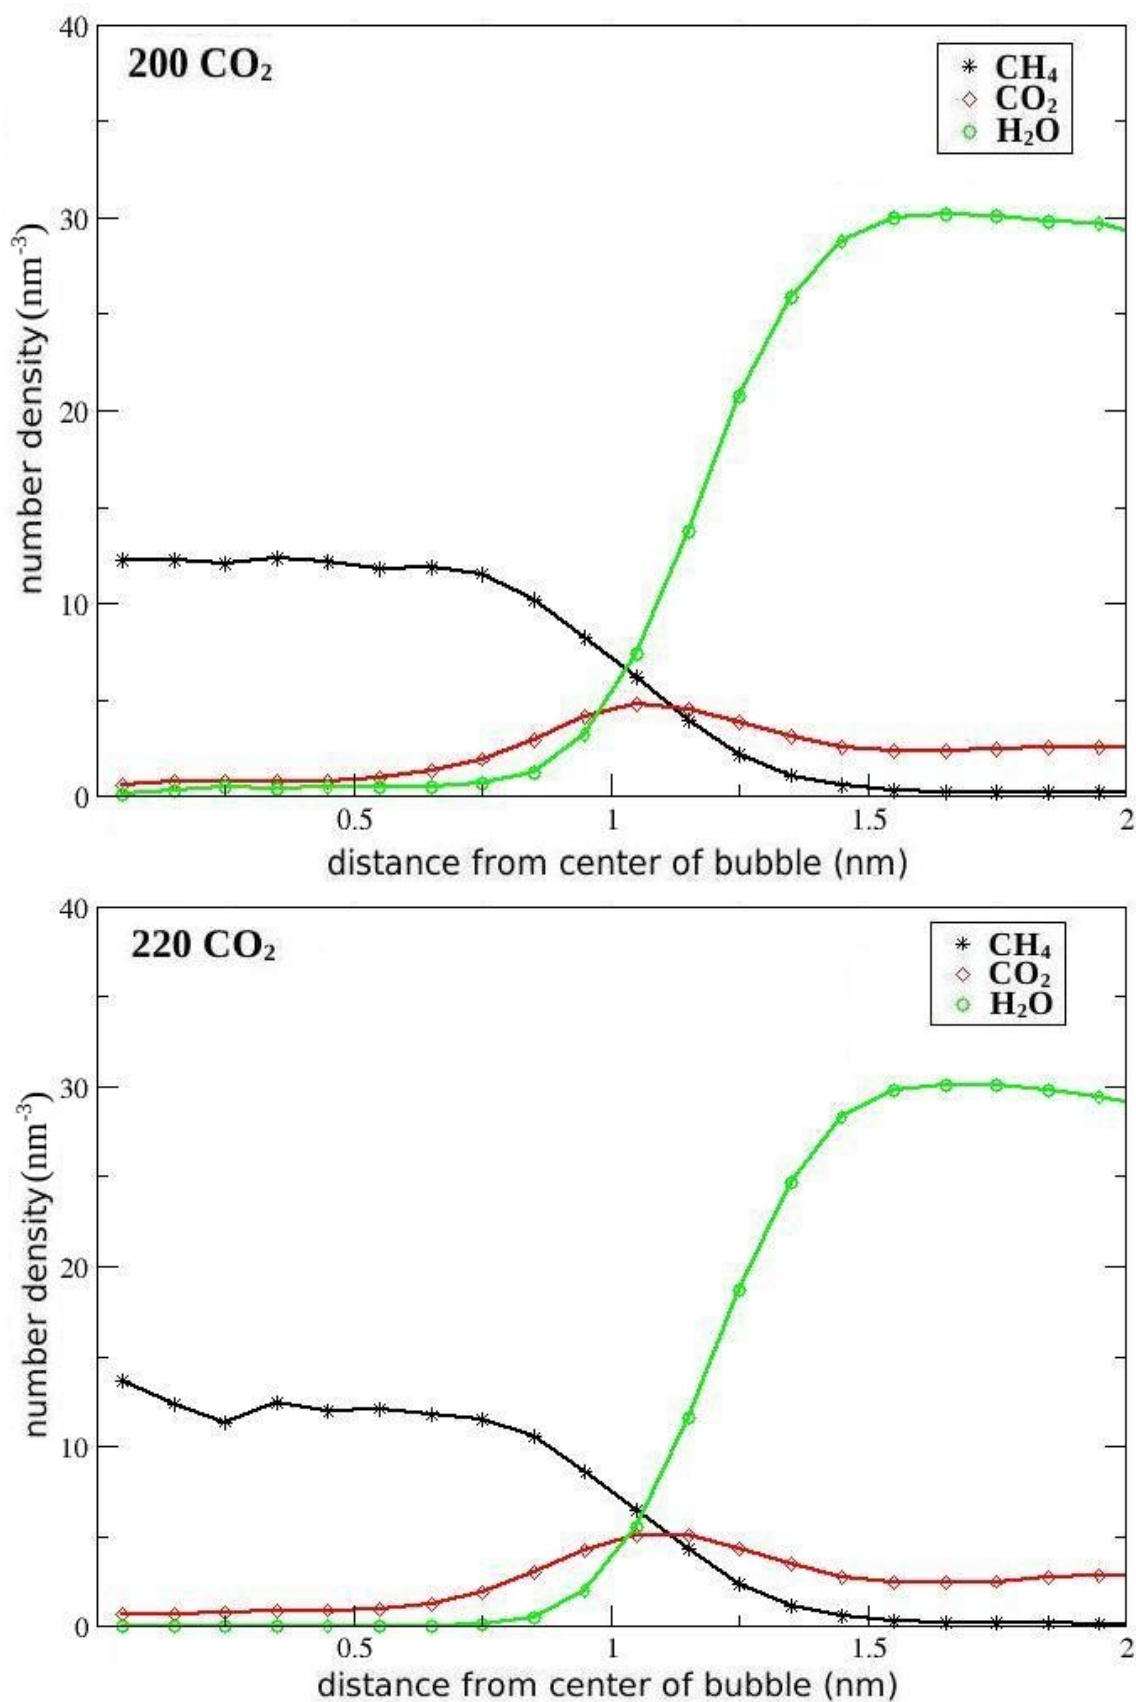

**Figure S3 :** The number density of  $\text{CH}_4$ ,  $\text{CO}_2$  and  $\text{H}_2\text{O}$  molecules as a function of distance from the center of the gas bubble for ternary systems with 160, 180, 200 and 220  $\text{CO}_2$  molecules.



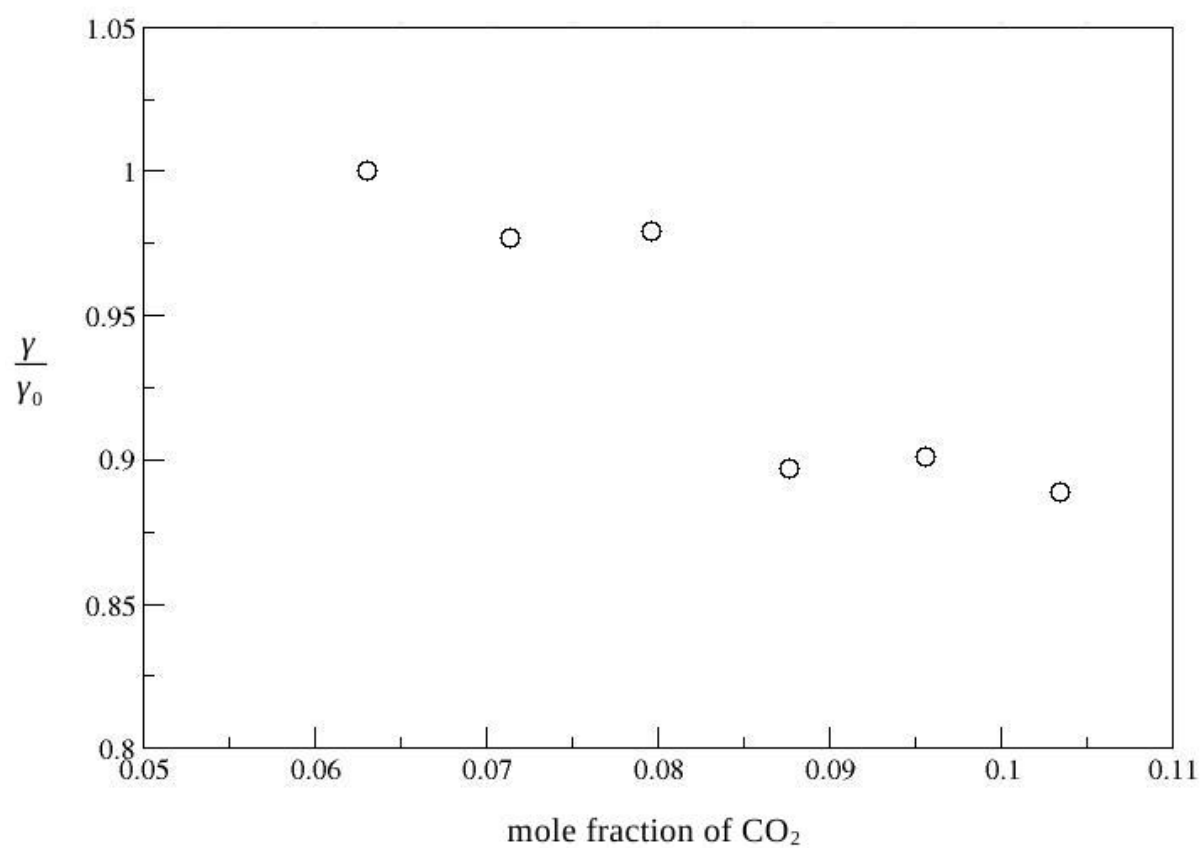

**Figure S4: The relative surface tension at the bubble-water interface as a function of concentration of  $\text{CO}_2$  in the ternary system.**

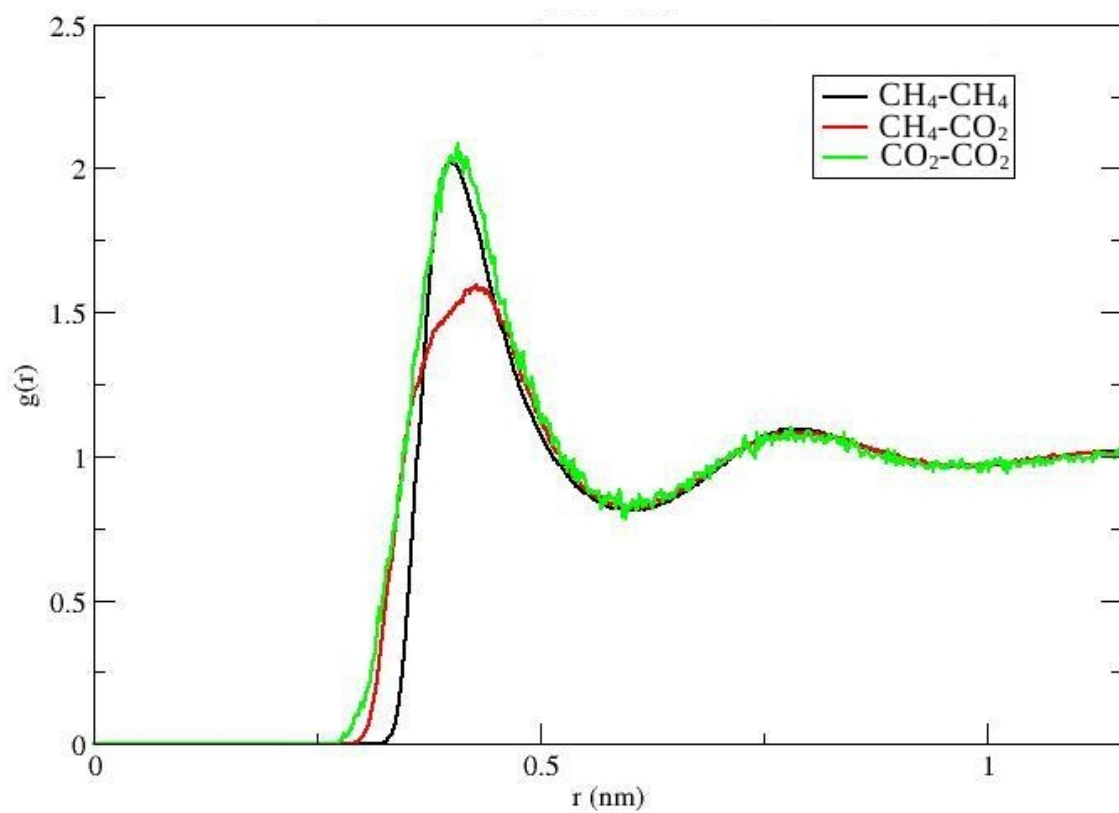

**Figure S5: Radial distribution function for the  $\text{CH}_4\text{-CH}_4$ ,  $\text{CH}_4\text{-CO}_2$  and  $\text{CO}_2\text{-CO}_2$  pair interactions in a dilute binary solution of  $\text{CO}_2$  in super critical  $\text{CH}_4$ .**
